# Supplementary material
Source: publisher site journal article supplement (https://www.dovepress.com/article/374024)
Supplement: Supplementary file 1 [file get_supplementary_file.php]

**Supplementary information**

**Figure S1**


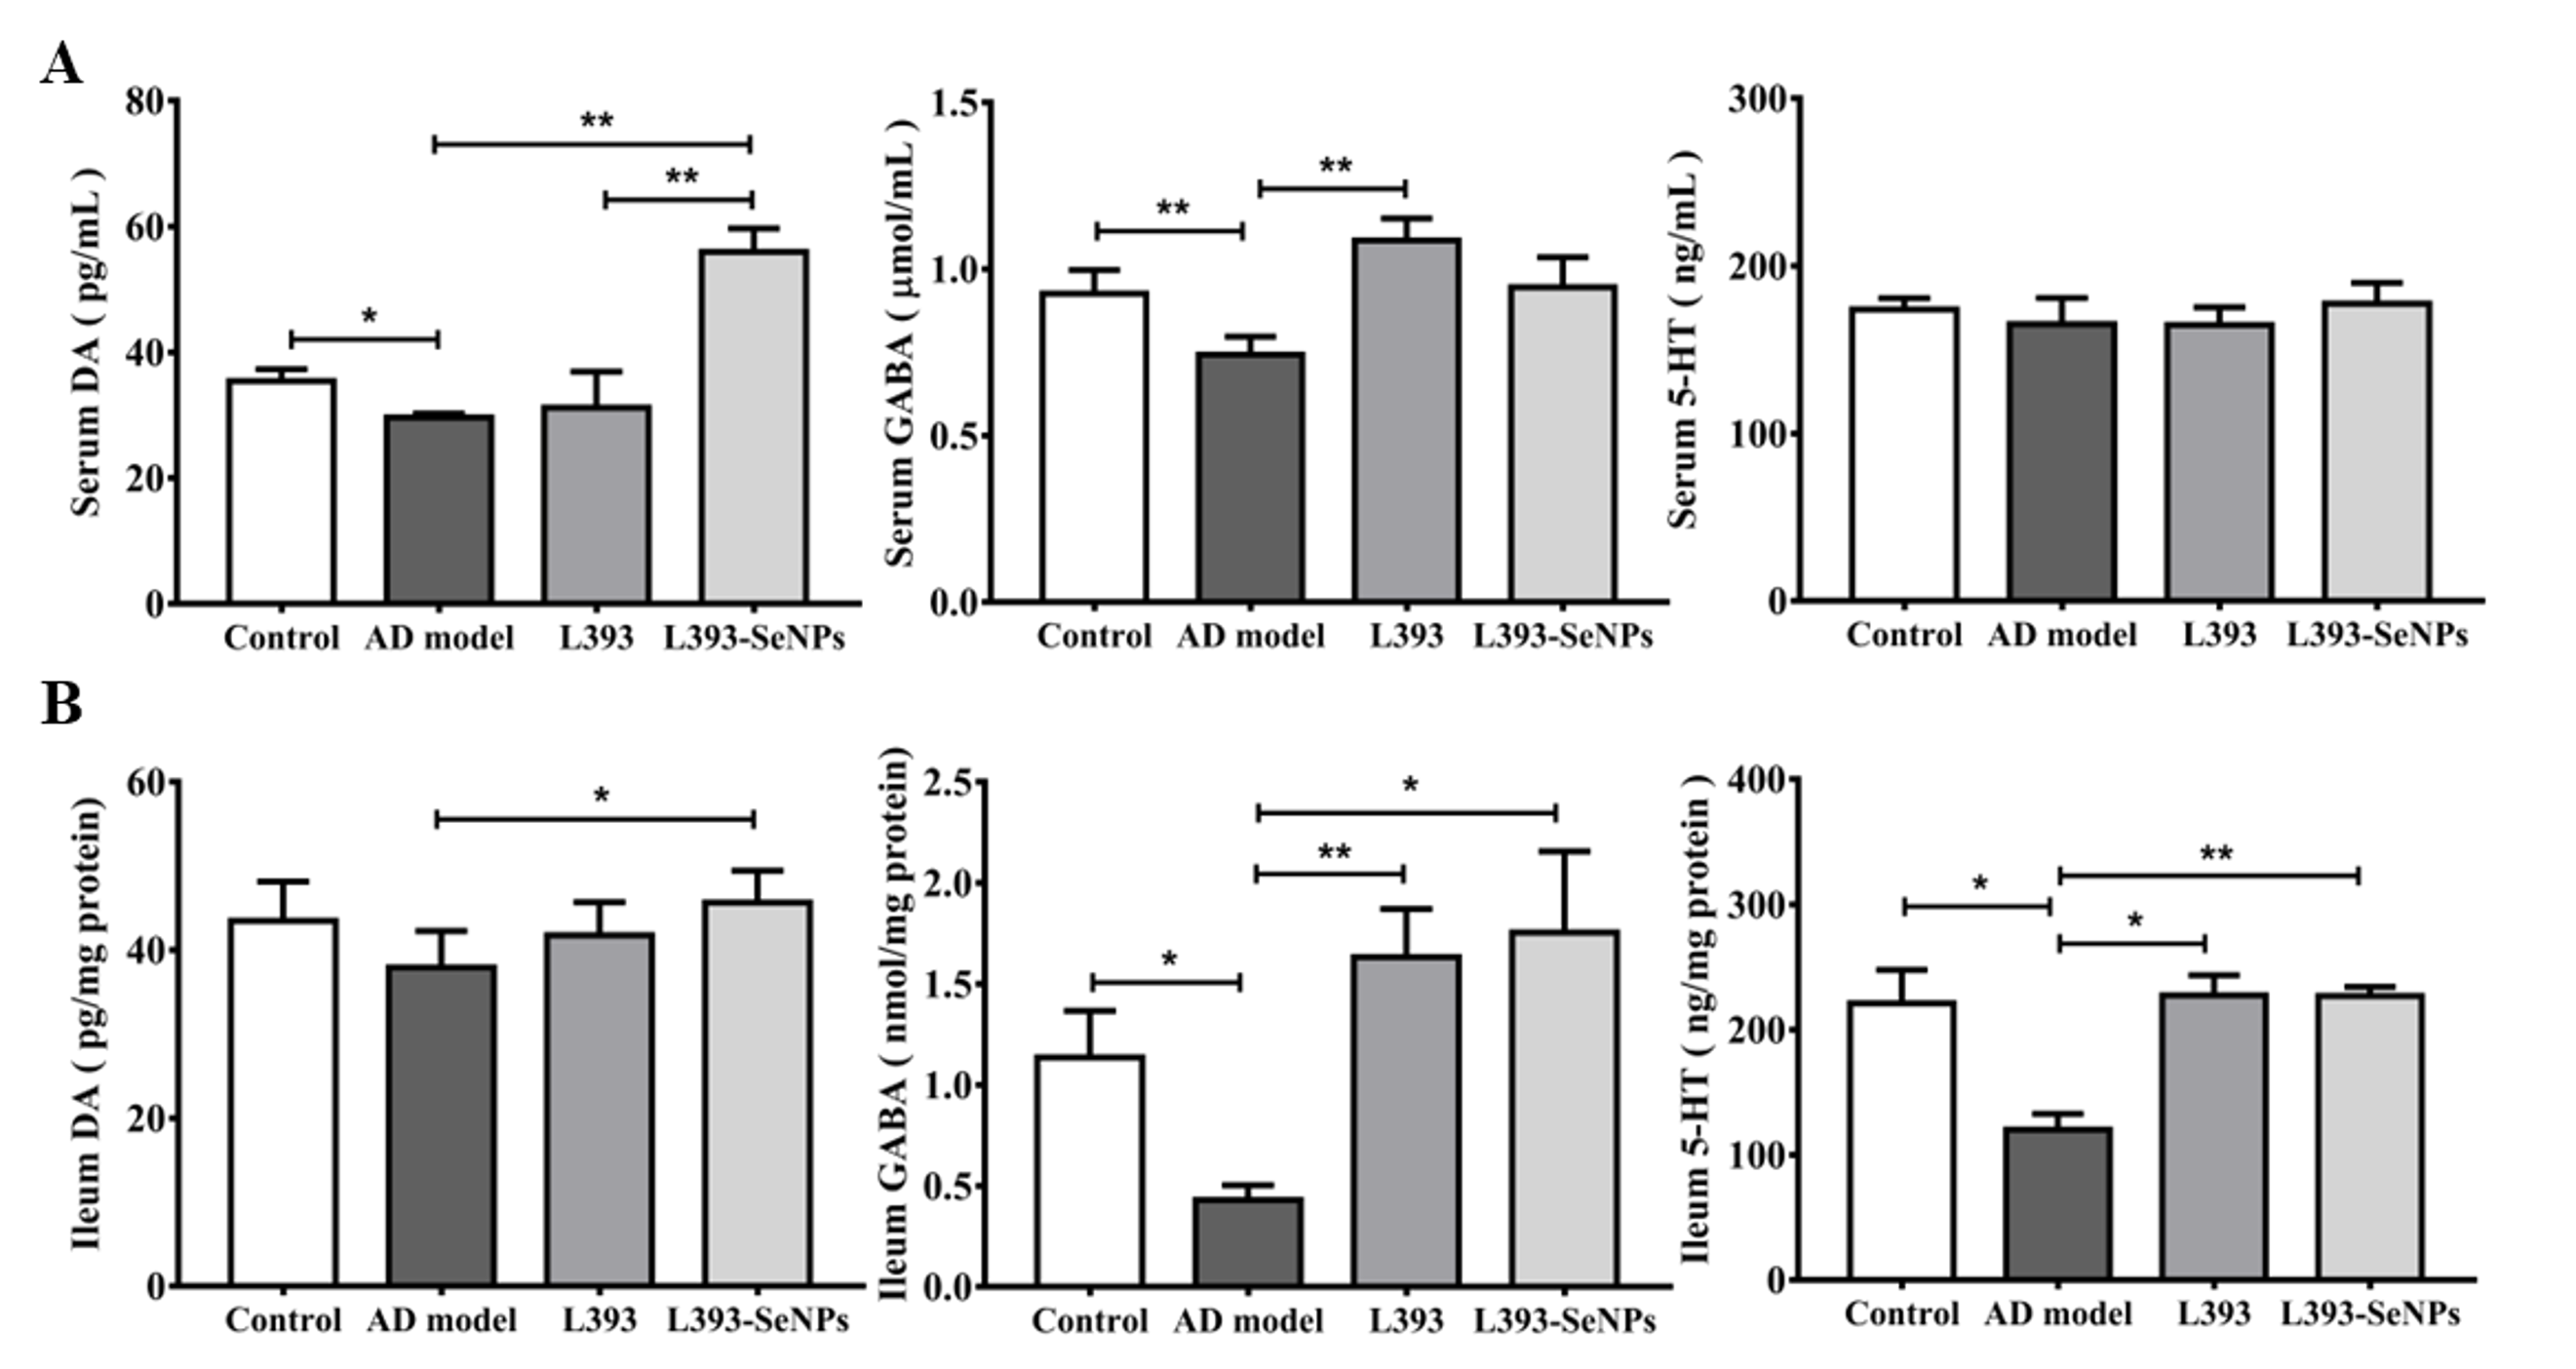


**Figure S1.** (A) The levels of neurotransmitters (DA, GABA and 5-HT) in serum. (B) The levels of neurotransmitters (DA, GABA and 5-HT) in ileum. Data are represented as the mean ± S.E.M. n=6. **P* < 0.05; ***P* < 0.01 (L393: *L. casei* ATCC 393, L393-SeNPs: *L. casei* ATCC393-SeNPs).

**Figure S2**


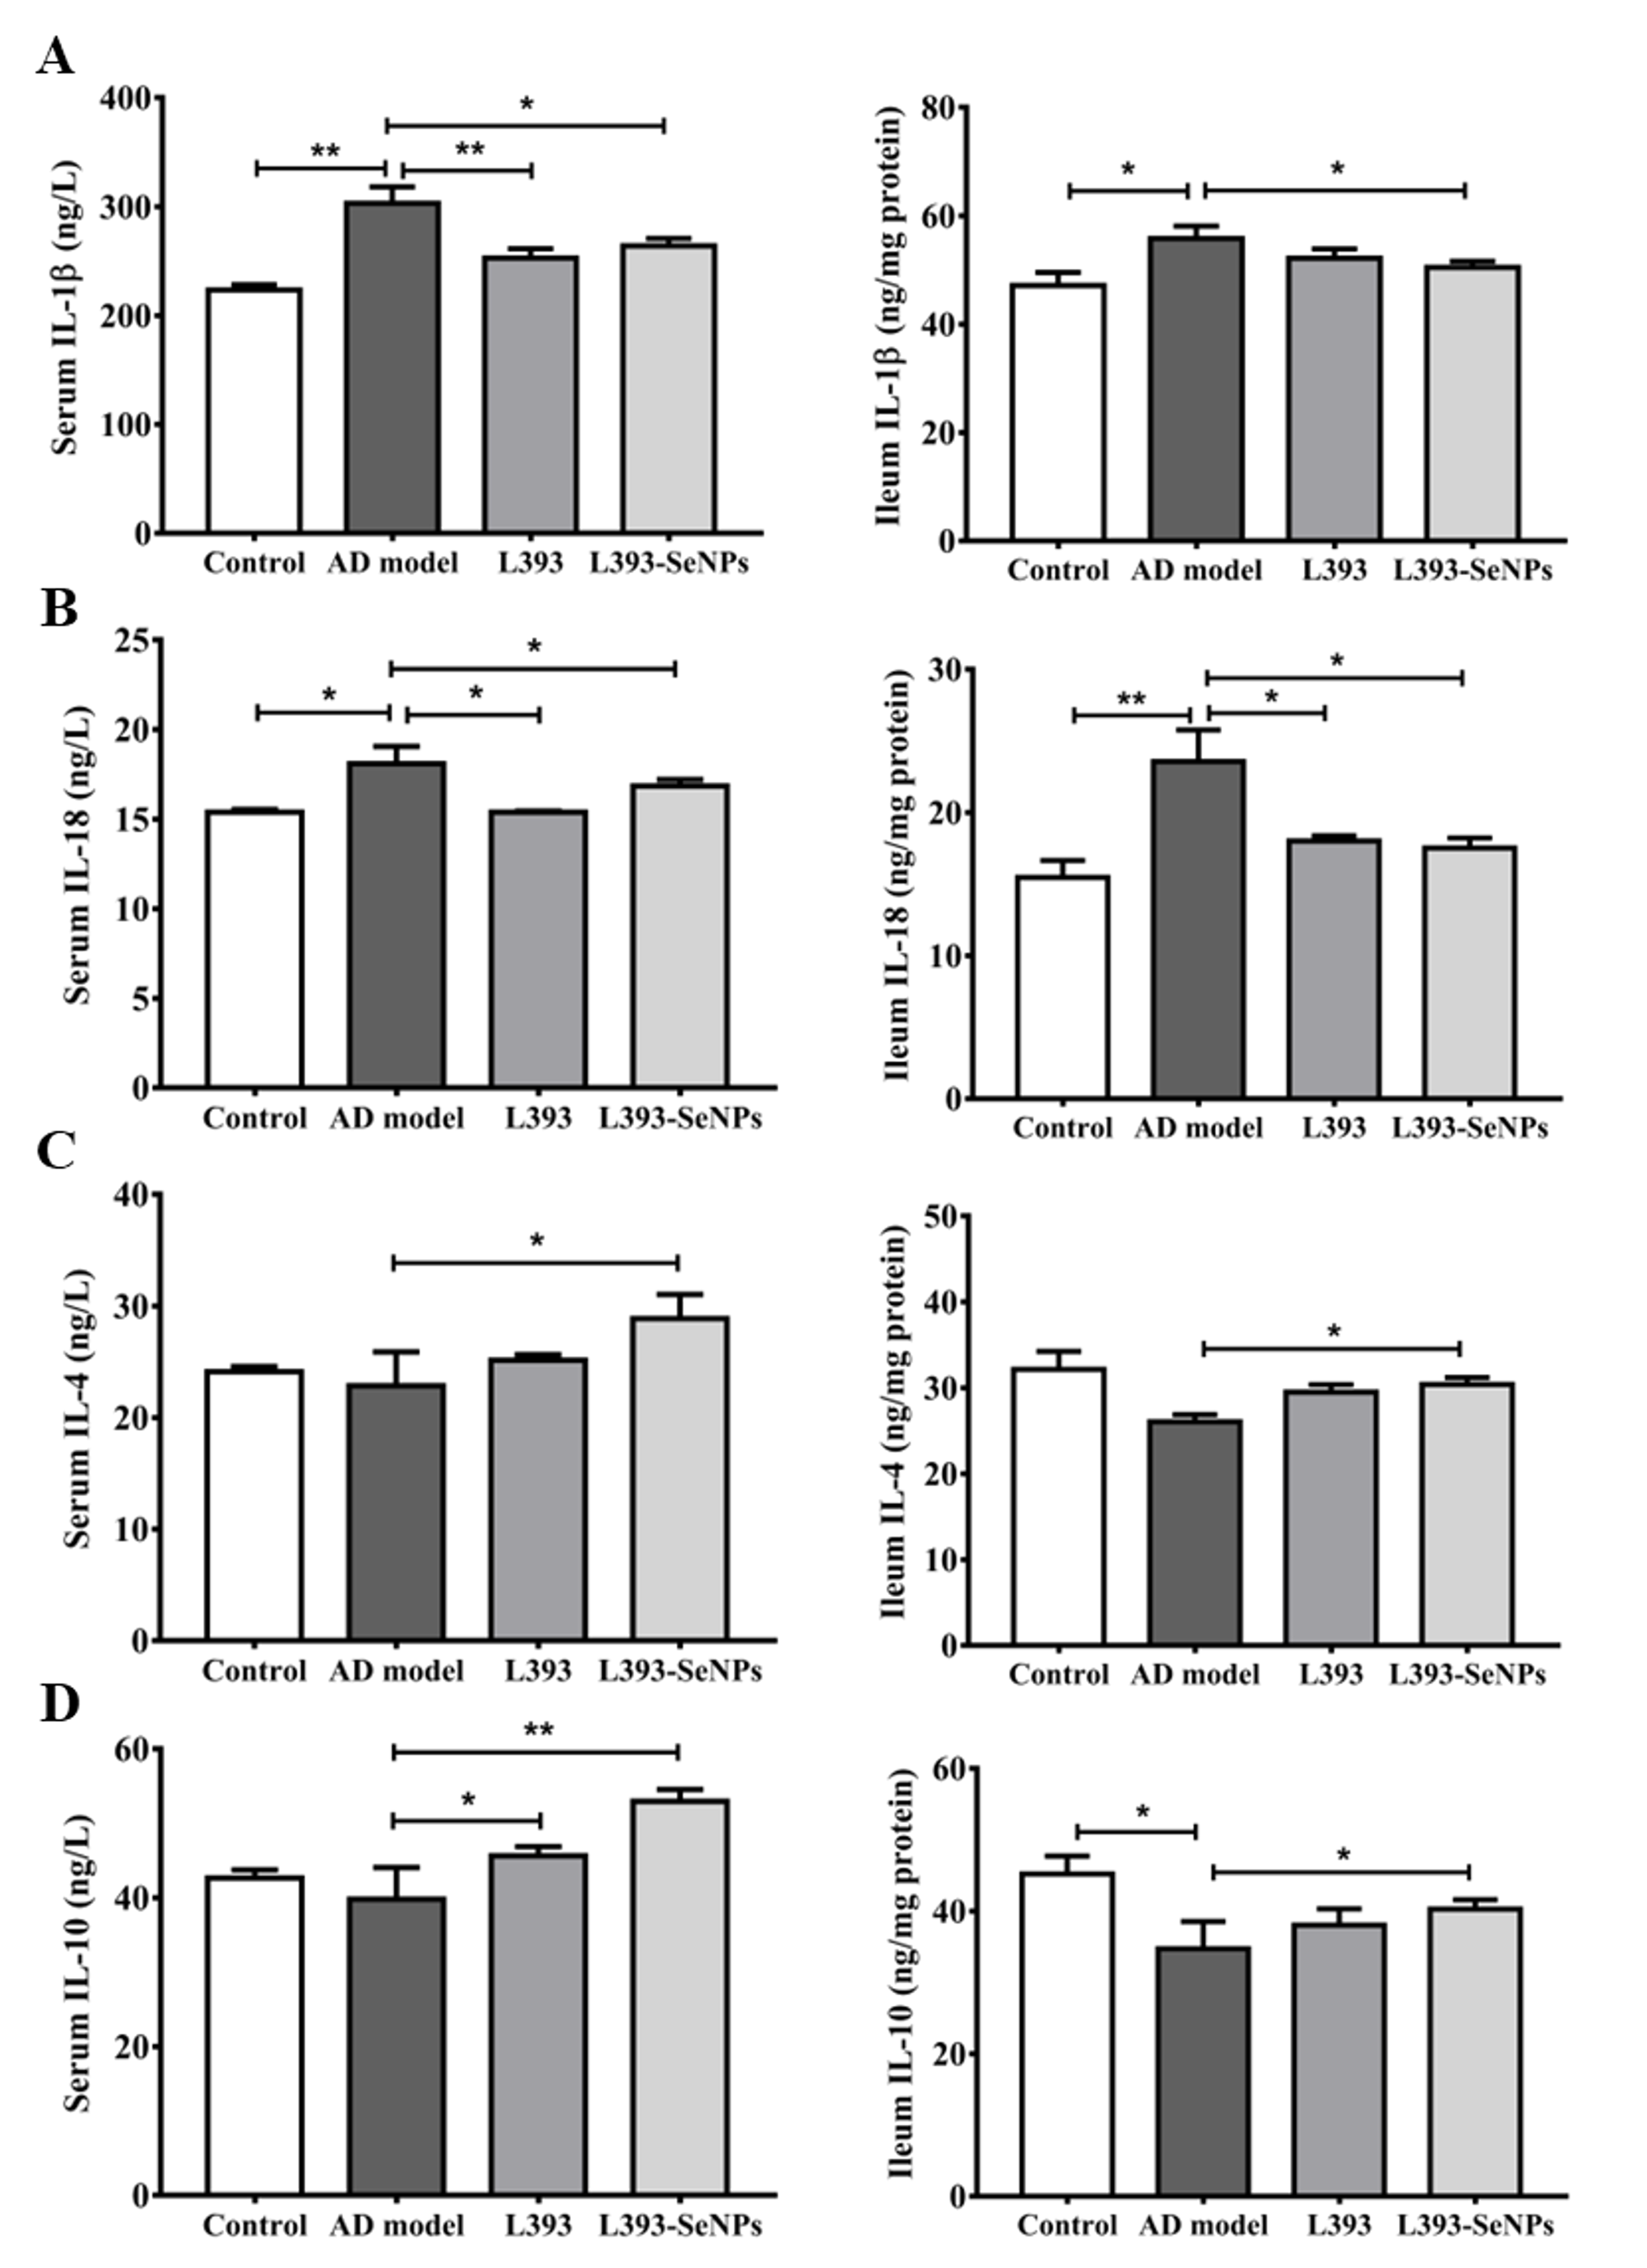


**Figure S2.** (C) IL-1β level in serum and ileum. (D) IL-18 level in serum and ileum. (E) IL-4 level in serum and ileum. (F) IL-10 level in serum and ileum. Data are represented as the mean ± S.E.M. n=6. **P* < 0.05; ***P* < 0.01 (L393: *L. casei* ATCC 393, L393-SeNPs: *L. casei* ATCC393-SeNPs).

**Figure S3**

**
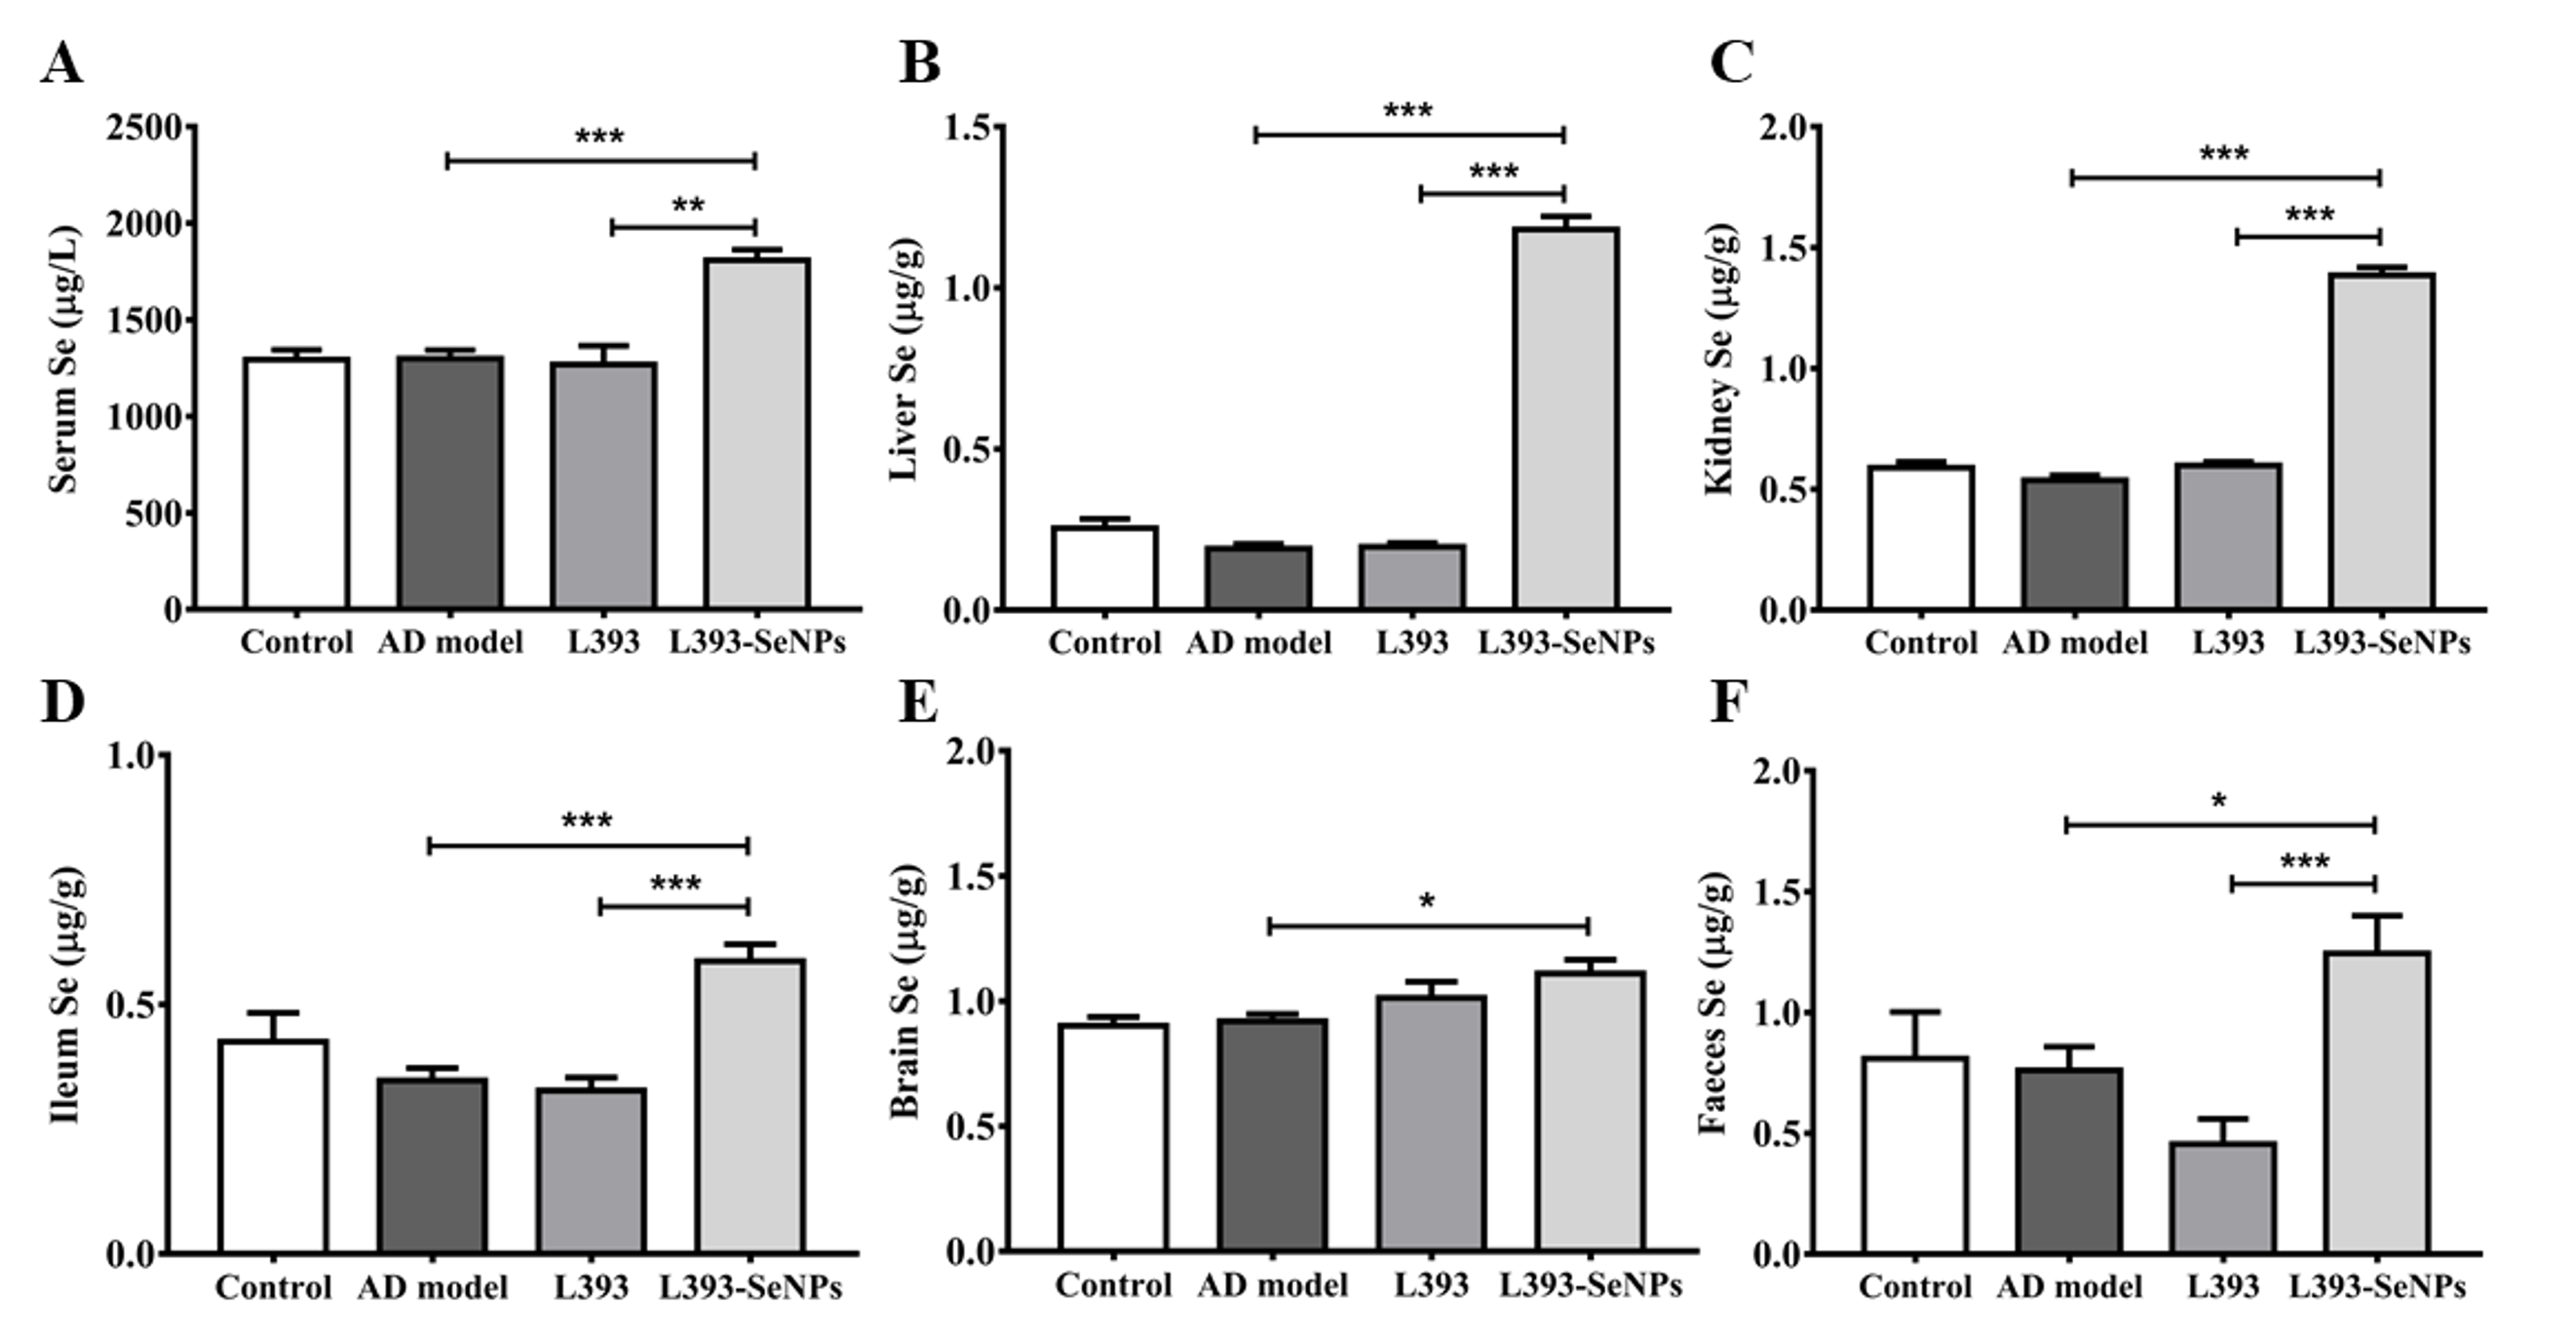
**

**Figure S3.** Effects of *L. casei* ATCC393-SeNPs on Se content of AD model mice. (A-F) The Se content in the serum, liver, kidney, ileum, brain and faeces. Data are represented as the mean ± S.E.M. n=5. **P* < 0.05; ***P* < 0.01; ****P* < 0.001 (L393: *L. casei* ATCC 393, L393-SeNPs: *L. casei* ATCC393-SeNPs).
